# Supplementary material for: RMBase v2.0: deciphering the map of RNA modifications from epitranscriptome sequencing data
Source: Oxford University Press journal article supplement (doi:10.1093/nar/gkx934), 2017-10-02
Supplement: gkx934_supp.pdf [file gkx934_supp.pdf]

## Supplementary Data

### RMBase v2.0: Deciphering the Map of RNA Modifications from Epitranscriptome Sequencing Data

#### Authors:

Jia-Jia Xuan<sup>1,2</sup>, Wen-Ju Sun<sup>1,2</sup>, Peng-Hui Lin<sup>1,2</sup>, Ke-Ren Zhou<sup>1,2</sup>, Shun Liu<sup>1,2</sup>, Ling-Ling Zheng<sup>1,2</sup>, Liang-Hu Qu<sup>1,2\*</sup>, Jian-Hua Yang<sup>1,2\*</sup>

**Table S1. The source of genomes and annotations used in RMBase v2.0.**

| Species              | Build    | Sequence           | Genome annotation  |
|----------------------|----------|--------------------|--------------------|
| Human                | hg19     | UCSC               | GENCODE v24        |
| Mouse                | mm10     | UCSC               | GENCODE vM11       |
| Rhesus               | rheMac8  | Ensembl Release-87 | Ensembl Release-87 |
| Chimpanzee           | panTro4  | Ensembl Release-87 | Ensembl Release-87 |
| Rat                  | rn5      | Ensembl Release-79 | Ensembl Release-79 |
| Pig                  | susScr3  | Ensembl Release-87 | Ensembl Release-87 |
| Zebrafish            | danRer10 | Ensembl Release-87 | Ensembl Release-87 |
| <i>S. cerevisiae</i> | sacCer3  | Ensembl Release-87 | Ensembl Release-87 |
| Fly                  | BGDP6    | Ensembl Release-87 | Ensembl Release-87 |
| <i>A. thaliana</i>   | TAIR10   | Ensembl Release-34 | Ensembl Release-34 |
| <i>S. pombe</i>      | ASM294v2 | Ensembl Release-34 | Ensembl Release-34 |
| <i>E. coli</i>       | ASM584v2 | Ensembl Release-34 | Ensembl Release-34 |
| <i>P. aetuginosa</i> | ASM676v1 | Ensembl Release-34 | Ensembl Release-34 |

**Table S2. The data sets associated with modification sites.**

| Data sets           | Human     | Mouse   | Resource              |
|---------------------|-----------|---------|-----------------------|
| RBP binding sites   | 61179671  | 6418630 | starBase v2.0         |
| miRNA binding sites | 364878    | 61805   | starBase v2.0         |
| SNVs                | 16782048  | /       | COSMIC                |
|                     | 4802718   | /       | PMID23945592          |
|                     | 1644607   | /       | PMID24390350          |
| SNPs                | 155540826 | /       | dbSNP 150             |
|                     | 314237    | /       | GWASdb                |
|                     | 1085981   | /       | GTEx                  |
|                     | 279956    | /       | ClinVar               |
|                     | 808291    | /       | CEU, CHB, JPT and YRI |

**Table S3. The statistics of RNA modification sites associated with some RBPs.**

|                | <b>Am</b>  | <b>Cm</b>  | <b>Gm</b>  | <b>m1A</b>  | <b>m5C</b>  | <b>m6A</b>     | <b>Um</b>  | <b>Y</b>    | <b>other</b> | <b>total</b> |
|----------------|------------|------------|------------|-------------|-------------|----------------|------------|-------------|--------------|--------------|
| <b>EIF4A3</b>  | 996(0.49%) | 976(0.48%) | 829(0.41%) | 1645(0.81%) | 17(0.01%)   | 197498(96.97%) | 445(0.22%) | 1229(0.6%)  | 25(0.01%)    | 203660       |
| <b>ELAVL</b>   | 606(0.38%) | 509(0.32%) | 457(0.28%) | 721(0.45%)  | 328(0.2%)   | 155476(96.86%) | 355(0.22%) | 1844(1.15%) | 225(0.14%)   | 160521       |
| <b>AGO</b>     | 948(0.43%) | 870(0.39%) | 873(0.39%) | 1149(0.52%) | 668(0.3%)   | 214176(96.16%) | 480(0.22%) | 3013(1.35%) | 543(0.24%)   | 222720       |
| <b>YTHDC1</b>  | 159(1.4%)  | 88(0.77%)  | 125(1.1%)  | 94(0.83%)   | 271(2.38%)  | 9770(85.91%)   | 141(1.24%) | 494(4.34%)  | 231(2.03%)   | 11373        |
| <b>YTHDF1</b>  | 53(0.21%)  | 54(0.21%)  | 52(0.2%)   | 30(0.12%)   | 3(0.01%)    | 25071(98.6%)   | 36(0.14%)  | 129(0.51%)  | 0(0%)        | 25428        |
| <b>YTHDF2</b>  | 0(0%)      | 0(0%)      | 1(0.06%)   | 0(0%)       | 0(0%)       | 1670(99.64%)   | 1(0.06%)   | 4(0.24%)    | 0(0%)        | 1676         |
| <b>WDR33</b>   | 431(0.48%) | 362(0.4%)  | 369(0.41%) | 520(0.58%)  | 407(0.45%)  | 86057(96.03%)  | 253(0.28%) | 1003(1.12%) | 210(0.23%)   | 89612        |
| <b>NOP58</b>   | 695(0.81%) | 483(0.56%) | 587(0.68%) | 1045(1.22%) | 527(0.61%)  | 80732(94.21%)  | 297(0.35%) | 1062(1.24%) | 269(0.31%)   | 85697        |
| <b>FBL</b>     | 635(0.83%) | 498(0.65%) | 577(0.75%) | 1000(1.31%) | 595(0.78%)  | 71252(93.21%)  | 321(0.42%) | 1151(1.51%) | 415(0.54%)   | 76444        |
| <b>FMR1</b>    | 387(0.5%)  | 459(0.59%) | 420(0.54%) | 364(0.47%)  | 217(0.28%)  | 74460(96%)     | 287(0.37%) | 890(1.15%)  | 82(0.11%)    | 77566        |
| <b>EIF3A</b>   | 2(2.15%)   | 0(0%)      | 0(0%)      | 0(0%)       | 0(0%)       | 86(92.47%)     | 1(1.08%)   | 3(3.23%)    | 1(1.08%)     | 93           |
| <b>EIF3B</b>   | 1(1.22%)   | 0(0%)      | 0(0%)      | 1(1.22%)    | 1(1.22%)    | 70(85.37%)     | 3(3.66%)   | 3(3.66%)    | 3(3.66%)     | 82           |
| <b>EIF3D</b>   | 2(1.72%)   | 0(0%)      | 1(0.86%)   | 1(0.86%)    | 1(0.86%)    | 95(81.9%)      | 5(4.31%)   | 8(6.9%)     | 3(2.59%)     | 116          |
| <b>EIF3G</b>   | 3(2.88%)   | 0(0%)      | 1(0.96%)   | 1(0.96%)    | 1(0.96%)    | 83(79.81%)     | 7(6.73%)   | 5(4.81%)    | 3(2.88%)     | 104          |
| <b>WTAP</b>    | 96(5.17%)  | 87(4.68%)  | 118(6.35%) | 30(1.62%)   | 279(15.02%) | 431(23.21%)    | 105(5.65%) | 426(22.94%) | 285(15.35%)  | 1857         |
| <b>METTL3</b>  | 170(6.1%)  | 146(5.24%) | 145(5.21%) | 38(1.36%)   | 279(10.02%) | 1071(38.46%)   | 110(3.95%) | 496(17.81%) | 330(11.85%)  | 2785         |
| <b>METTL14</b> | 169(7.23%) | 137(5.86%) | 127(5.44%) | 26(1.11%)   | 234(10.02%) | 856(36.64%)    | 126(5.39%) | 414(17.72%) | 247(10.57%)  | 2336         |
| <b>ALKBH5</b>  | 9(1.68%)   | 2(0.37%)   | 7(1.3%)    | 2(0.37%)    | 2(0.37%)    | 490(91.25%)    | 12(2.23%)  | 10(1.86%)   | 3(0.56%)     | 537          |

**Table S4. Putative diseases-related RNA modification Sites.**

|              | MEL            | LUAD              | UCEC              | Stomach<br>Cancer | CRC               | BRCA             | Hepatocellular<br>Carcinomas | HNSC            | LUSC            | CLL             | AML              |
|--------------|----------------|-------------------|-------------------|-------------------|-------------------|------------------|------------------------------|-----------------|-----------------|-----------------|------------------|
| <b>Am</b>    | 56(0.31%)      | 50(0.4%)          | 58(0.48%)         | 11(0.23%)         | 49(0.41%)         | 23(0.57%)        | 25(0.52%)                    | 20(0.5%)        | 15(0.44%)       | 3(0.53%)        | 5(0.33%)         |
| <b>Cm</b>    | 42(0.23%)      | 46(0.37%)         | 49(0.4%)          | 14(0.29%)         | 43(0.36%)         | 9(0.22%)         | 16(0.33%)                    | 17(0.43%)       | 9(0.26%)        | 3(0.53%)        | 5(0.33%)         |
| <b>Gm</b>    | 40(0.22%)      | 26(0.21%)         | 36(0.3%)          | 16(0.33%)         | 35(0.3%)          | 9(0.22%)         | 16(0.33%)                    | 12(0.3%)        | 9(0.26%)        | 0(0%)           | 2(0.13%)         |
| <b>m1A</b>   | 107(0.59%)     | 88(0.7%)          | 112(0.92%)        | 37(0.76%)         | 102(0.86%)        | 34(0.84%)        | 44(0.91%)                    | 36(0.9%)        | 14(0.41%)       | 5(0.89%)        | 14(0.92%)        |
| <b>m5C</b>   | 0(0%)          | 17(0.13%)         | 0(0%)             | 1(0.02%)          | 0(0%)             | 3(0.07%)         | 8(0.17%)                     | 1(0.03%)        | 0(0%)           | 0(0%)           | 0(0%)            |
| <b>m6A</b>   | 17657<br>(98%) | 12262<br>(97.36%) | 11798<br>(96.96%) | 4729<br>(97.69%)  | 11540<br>(97.38%) | 3908<br>(96.68%) | 4696<br>(96.92%)             | 3889<br>(97.3%) | 3355<br>(97.9%) | 544<br>(96.45%) | 1494<br>(97.84%) |
| <b>Um</b>    | 20(0.11%)      | 14(0.11%)         | 27(0.22%)         | 6(0.12%)          | 18(0.15%)         | 14(0.35%)        | 7(0.14%)                     | 4(0.1%)         | 7(0.2%)         | 3(0.53%)        | 3(0.2%)          |
| <b>Y</b>     | 95(0.53%)      | 84(0.67%)         | 85(0.7%)          | 27(0.56%)         | 64(0.54%)         | 39(0.96%)        | 27(0.56%)                    | 18(0.45%)       | 18(0.53%)       | 6(1.06%)        | 4(0.26%)         |
| <b>other</b> | 0(0%)          | 7(0.06%)          | 3(0.02%)          | 0(0%)             | 0(0%)             | 3(0.07%)         | 6(0.12%)                     | 0(0%)           | 0(0%)           | 0(0%)           | 0(0%)            |
| <b>total</b> | 18017          | 12594             | 12168             | 4841              | 11851             | 4042             | 4845                         | 3997            | 3427            | 564             | 1527             |

**Figure S1. The results page of various RNA modification sites in genes by filtering “lincRNA” in “modGene” interface.**

Search Results for Human modgenes [Help](#)

Show  entries Search all columns:

| Gene          | Gene ID            | Gene Type                                                   | Strand | m6A Num | m1A Num | m5C Num | 2'-O-Me Num | PseudoU |
|---------------|--------------------|-------------------------------------------------------------|--------|---------|---------|---------|-------------|---------|
| NEAT1         | ENSG00000245532.5  | lincRNA                                                     | +      | 106     | 1       | 0       | 3           | 0       |
| RP1-140K8.5   | ENSG00000260604.2  | lincRNA                                                     | -      | 96      | 0       | 0       | 0           | 0       |
| XIST          | ENSG00000229807.9  | lincRNA                                                     | -      | 89      | 0       | 0       | 4           | 1       |
| LINC00346     | ENSG00000255874.2  | lincRNA                                                     | -      | 79      | 0       | 0       | 0           | 0       |
| RP11-258F22.1 | ENSG00000198105.11 | lincRNA                                                     | -      | 77      | 0       | 0       | 0           | 0       |
| AL133493.2    | ENSG00000233922.2  | lincRNA                                                     | +      | 62      | 0       | 0       | 0           | 0       |
| RP11-284F21.9 | ENSG00000272068.1  | lincRNA                                                     | -      | 58      | 0       | 0       | 0           | 0       |
| CTC-559E9.1   | ENSG00000267581.1  | lincRNA                                                     | -      | 57      | 0       | 0       | 0           | 0       |
| SPATA13       | ENSG00000182957.15 | lincRNA,processed_transcript,protein_coding,retained_intron | +      | 55      | 0       | 0       | 0           | 0       |
| KBTBD11-OT1   | ENSG00000176595.3  | lincRNA                                                     | +      | 55      | 0       | 0       | 0           | 0       |

Showing 1 to 10 of 1,727 entries (filtered from 23,391 total entries) First Previous 1 2 3 4 5 ... 173 Next Last

**Figure S2. The results of the list of RNA modification sites associated with “FMR1” in “modRBP” interface.**

Relationships between RNA modifications and RBP binding regions in Human [Help](#)

Show  entries Search all columns:

| RBPID           | ModID          | ModType | SupportNum | RBPname | RBPtype | ClipExpNum | GeneName                      | GeneType                             |
|-----------------|----------------|---------|------------|---------|---------|------------|-------------------------------|--------------------------------------|
| RBP_site_637605 | m6A_site_99966 | m6A     | 3          | FMR1    | -       | 1          | HOXC11                        | protein_coding                       |
| RBP_site_637585 | m6A_site_99956 | m6A     | 5          | FMR1    | -       | 1          | HOTAIR                        | antisense                            |
| RBP_site_637365 | m6A_site_99889 | m6A     | 34         | FMR1    | -       | 1          | CALCOCO1,CALCOCO1             | retained_intron,protein_coding       |
| RBP_site_636954 | m6A_site_99840 | m6A     | 2          | FMR1    | -       | 2          | ATP5G2,ATP5G2,ATP5G2          | retained_intron,protein_coding,prote |
| RBP_site_636903 | m6A_site_99839 | m6A     | 1          | FMR1    | -       | 2          | ATP5G2,ATP5G2,ATP5G2          | retained_intron,protein_coding,prote |
| RBP_site_636846 | m6A_site_99838 | m6A     | 2          | FMR1    | -       | 2          | ATP5G2,ATP5G2,ATP5G2,ATP5G2   | processed_transcript,protein_coding  |
| RBP_site_636795 | m6A_site_99835 | m6A     | 8          | FMR1    | -       | 1          | ATF7,ATF7                     | retained_intron,protein_coding       |
| RBP_site_636760 | m6A_site_99832 | m6A     | 8          | FMR1    | -       | 1          | RP11-793H13.10,ATF7,ATF7,ATF7 | protein_coding,retained_intron,prote |
| RBP_site_636447 | m6A_site_99767 | m6A     | 6          | FMR1    | -       | 1          | RP11-793H13.10,ATF7,ATF7      | protein_coding,protein_coding,protei |
| RBP_site_636406 | m6A_site_99762 | m6A     | 22         | FMR1    | -       | 1          | TARBP2,TARBP2,TARBP2          | protein_coding,nonsense_mediated,    |

Showing 1 to 10 of 74,460 entries (filtered from 2,886,675 total entries) First Previous 1 2 3 4 5 ... 7446 Next Last
